# Supplementary material
Source: MDPI journal article supplement (https://www.mdpi.com/2073-4344/8/4/141)
Supplement: s1 [file s1]

data_complex_7
_audit_creation_date              2016-10-25
_audit_creation_method
;
Olex2 1.2
(compiled 2016.09.09 svn.r3337 for OlexSys, GUI svn.r5227)
;
_publ_contact_author_address      ?
_publ_contact_author_email        ?
_publ_contact_author_id_orcid     ?
_publ_contact_author_name         ''
_publ_contact_author_phone        ?
_publ_section_references
;
Dolomanov, O.V., Bourhis, L.J., Gildea, R.J, Howard, J.A.K. & Puschmann, H.
 (2009), J. Appl. Cryst. 42, 339-341.

Palatinus, L. & Chapuis, G. (2007). J. Appl. Cryst., 40, 786-790;
Palatinus, L. & van der Lee, A. (2008). J. Appl. Cryst. 41, 975-984;
Palatinus, L., Prathapa, S. J. & van Smaalen, S. (2012). J. Appl. Cryst. 45,
 575-580.

Sheldrick, G.M. (2015). Acta Cryst. C71, 3-8.
;
_chemical_name_common             ?
_chemical_name_systematic         ?
_chemical_formula_moiety          'C17 H27 Cl2 N3 Pd, C H2 Cl2'
_chemical_formula_sum             'C18 H29 Cl4 N3 Pd'
_chemical_formula_weight          535.64
_chemical_melting_point           ?
_chemical_oxdiff_formula          'C17 H27 Cl2 N3 Pd'
loop_
  _atom_type_symbol
  _atom_type_description
  _atom_type_scat_dispersion_real
  _atom_type_scat_dispersion_imag
  _atom_type_scat_source
 'C' 'C' 0.0033 0.0016 'International Tables Vol C Tables 4.2.6.8 and 6.1.1.4'
 'H' 'H' 0.0000 0.0000 'International Tables Vol C Tables 4.2.6.8 and 6.1.1.4'
 'Cl' 'Cl' 0.1484 0.1585 'International Tables Vol C Tables 4.2.6.8 and 6.1.1.4'
 'N' 'N' 0.0061 0.0033 'International Tables Vol C Tables 4.2.6.8 and 6.1.1.4'
 'Pd' 'Pd' -0.9988 1.0072
 'International Tables Vol C Tables 4.2.6.8 and 6.1.1.4'

_shelx_space_group_comment
;
The symmetry employed for this shelxl refinement is uniquely defined
by the following loop, which should always be used as a source of
symmetry information in preference to the above space-group names.
They are only intended as comments.
;
_space_group_crystal_system       'monoclinic'
_space_group_IT_number            14
_space_group_name_H-M_alt         'P 1 21/c 1'
_space_group_name_Hall            '-P 2ybc'
loop_
  _space_group_symop_operation_xyz
 'x, y, z'
 '-x, y+1/2, -z+1/2'
 '-x, -y, -z'
 'x, -y-1/2, z-1/2'

_cell_length_a                    11.0475(5)
_cell_length_b                    18.5954(8)
_cell_length_c                    12.1466(5)
_cell_angle_alpha                 90
_cell_angle_beta                  109.119(5)
_cell_angle_gamma                 90
_cell_volume                      2357.67(18)
_cell_formula_units_Z             4
_cell_measurement_reflns_used     5720
_cell_measurement_temperature     100.00(10)
_cell_measurement_theta_max       31.9010
_cell_measurement_theta_min       3.4320
_shelx_estimated_absorpt_T_max    ?
_shelx_estimated_absorpt_T_min    ?
_exptl_absorpt_coefficient_mu     1.248
_exptl_absorpt_correction_T_max   1.00000
_exptl_absorpt_correction_T_min   0.97747
_exptl_absorpt_correction_type    multi-scan
_exptl_absorpt_process_details
;
CrysAlisPro, Agilent Technologies,
Version 1.171.36.32 (release 02-08-2013 CrysAlis171 .NET)
(compiled Aug  2 2013,16:46:58)
Empirical absorption correction using spherical harmonics,
 implemented in SCALE3 ABSPACK scaling algorithm.
;
_exptl_absorpt_special_details    ?
_exptl_crystal_colour             colourless
_exptl_crystal_colour_primary     colourless
_exptl_crystal_density_diffrn     1.509
_exptl_crystal_density_meas       ?
_exptl_crystal_density_method     ?
_exptl_crystal_description        prism
_exptl_crystal_F_000              1088
_exptl_crystal_size_max           0.2
_exptl_crystal_size_mid           0.2
_exptl_crystal_size_min           0.2
_exptl_transmission_factor_max    ?
_exptl_transmission_factor_min    ?
_diffrn_reflns_av_R_equivalents   0.0267
_diffrn_reflns_av_unetI/netI      0.0354
_diffrn_reflns_Laue_measured_fraction_full 0.999
_diffrn_reflns_Laue_measured_fraction_max 0.999
_diffrn_reflns_limit_h_max        14
_diffrn_reflns_limit_h_min        -14
_diffrn_reflns_limit_k_max        23
_diffrn_reflns_limit_k_min        -24
_diffrn_reflns_limit_l_max        14
_diffrn_reflns_limit_l_min        -15
_diffrn_reflns_number             12524
_diffrn_reflns_point_group_measured_fraction_full 0.999
_diffrn_reflns_point_group_measured_fraction_max 0.999
_diffrn_reflns_theta_full         25.242
_diffrn_reflns_theta_max          27.499
_diffrn_reflns_theta_min          2.819
_diffrn_ambient_temperature       100.00(10)
_diffrn_detector_area_resol_mean  16.2096
_diffrn_measured_fraction_theta_full 0.999
_diffrn_measured_fraction_theta_max 0.999
_diffrn_measurement_details
;
#__ type_ start__ end____ width___ exp.time_
  1 omega  -98.00  -62.00   1.0000   14.0000
omega____ theta____ kappa____ phi______ frames
    -      -25.4311 -178.0000 -180.0000 36

#__ type_ start__ end____ width___ exp.time_
  2 omega   57.00   98.00   1.0000   14.0000
omega____ theta____ kappa____ phi______ frames
    -       26.3686  178.0000  -60.0000 41

#__ type_ start__ end____ width___ exp.time_
  3 omega  -45.00   77.00   1.0000   14.0000
omega____ theta____ kappa____ phi______ frames
    -       26.3686    0.0000 -150.0000 122

#__ type_ start__ end____ width___ exp.time_
  4 omega   53.00  103.00   1.0000   14.0000
omega____ theta____ kappa____ phi______ frames
    -       26.3686 -178.0000 -150.0000 50

#__ type_ start__ end____ width___ exp.time_
  5 omega    8.00   34.00   1.0000   14.0000
omega____ theta____ kappa____ phi______ frames
    -       26.3686   57.0000 -120.0000 26
;
_diffrn_measurement_device_type   'Xcalibur, Eos'
_diffrn_measurement_method        '\w scans'
_diffrn_orient_matrix_UB_11       -0.0619526000
_diffrn_orient_matrix_UB_12       0.0155812000
_diffrn_orient_matrix_UB_13       -0.0181592000
_diffrn_orient_matrix_UB_21       0.0241654000
_diffrn_orient_matrix_UB_22       0.0299158000
_diffrn_orient_matrix_UB_23       0.0368876000
_diffrn_orient_matrix_UB_31       0.0138248000
_diffrn_orient_matrix_UB_32       0.0177320000
_diffrn_orient_matrix_UB_33       -0.0462627000
_diffrn_radiation_monochromator   graphite
_diffrn_radiation_type            MoK\a
_diffrn_radiation_wavelength      0.71073
_diffrn_source                    'Enhance (Mo) X-ray Source'
_reflns_Friedel_coverage          0.000
_reflns_Friedel_fraction_full     .
_reflns_Friedel_fraction_max      .
_reflns_number_gt                 4697
_reflns_number_total              5422
_reflns_odcompleteness_completeness 99.86
_reflns_odcompleteness_iscentric  1
_reflns_odcompleteness_theta      30.01
_reflns_special_details
;
 Reflections were merged by SHELXL according to the crystal
 class for the calculation of statistics and refinement.
 
 _reflns_Friedel_fraction is defined as the number of unique
 Friedel pairs measured divided by the number that would be
 possible theoretically, ignoring centric projections and
 systematic absences.
;
_reflns_threshold_expression      'I > 2\s(I)'
_computing_cell_refinement
;
CrysAlisPro, Agilent Technologies,
Version 1.171.36.32 (release 02-08-2013 CrysAlis171 .NET)
(compiled Aug  2 2013,16:46:58)
;
_computing_data_collection
;
CrysAlisPro, Agilent Technologies,
Version 1.171.36.32 (release 02-08-2013 CrysAlis171 .NET)
(compiled Aug  2 2013,16:46:58)
;
_computing_data_reduction
;
CrysAlisPro, Agilent Technologies,
Version 1.171.36.32 (release 02-08-2013 CrysAlis171 .NET)
(compiled Aug  2 2013,16:46:58)
;
_computing_molecular_graphics     'Olex2 (Dolomanov et al., 2009)'
_computing_publication_material   'Olex2 (Dolomanov et al., 2009)'
_computing_structure_refinement   'ShelXL (Sheldrick, 2015)'
_computing_structure_solution
;
Superflip (Palatinus & Chapuis, 2007;Palatinus & van der Lee, 2008;
Palatinus et al., 2012)
;
_refine_diff_density_max          0.761
_refine_diff_density_min          -0.643
_refine_diff_density_rms          0.085
_refine_ls_extinction_coef        .
_refine_ls_extinction_method      none
_refine_ls_goodness_of_fit_ref    1.045
_refine_ls_hydrogen_treatment     constr
_refine_ls_matrix_type            full
_refine_ls_number_parameters      260
_refine_ls_number_reflns          5422
_refine_ls_number_restraints      0
_refine_ls_R_factor_all           0.0358
_refine_ls_R_factor_gt            0.0278
_refine_ls_restrained_S_all       1.045
_refine_ls_shift/su_max           0.001
_refine_ls_shift/su_mean          0.000
_refine_ls_structure_factor_coef  Fsqd
_refine_ls_weighting_details
'w=1/[\s^2^(Fo^2^)+(0.0240P)^2^+1.9256P] where P=(Fo^2^+2Fc^2^)/3'
_refine_ls_weighting_scheme       calc
_refine_ls_wR_factor_gt           0.0618
_refine_ls_wR_factor_ref          0.0660
_refine_special_details           ?
_olex2_refinement_description
;
1. Fixed Uiso
 At 1.2 times of:
  All C(H) groups, All C(H,H) groups, All N(H) groups
 At 1.5 times of:
  All C(H,H,H) groups
2. Uiso/Uaniso restraints and constraints
Uanis(C4) = Uanis(C6) = Uanis(C5)
3. Others
 Sof(C6)=Sof(H6A)=Sof(H6B)=Sof(H6C)=Sof(C5)=Sof(H5A)=Sof(H5B)=Sof(H5C)=Sof(C4)=
 Sof(H4A)=Sof(H4B)=Sof(H4C)=1-FVAR(1)
 Sof(C4A)=Sof(H4AA)=Sof(H4AB)=Sof(H4AC)=Sof(C6A)=Sof(H6AA)=Sof(H6AB)=Sof(H6AC)=
 Sof(C5A)=Sof(H5AA)=Sof(H5AB)=Sof(H5AC)=FVAR(1)
4.a Secondary CH2 refined with riding coordinates:
 C11(H11A,H11B), C1S(H1SA,H1SB)
4.b Aromatic/amide H refined with riding coordinates:
 N5(H5), N2(H2), C13(H13), C14(H14), C15(H15), C17(H17), C16(H16)
4.c Idealised Me refined as rotating group:
 C10(H10A,H10B,H10C), C8(H8A,H8B,H8C), C9(H9A,H9B,H9C), C4A(H4AA,H4AB,H4AC),
 C6A(H6AA,H6AB,H6AC), C5A(H5AA,H5AB,H5AC), C6(H6A,H6B,H6C), C5(H5A,H5B,H5C),
 C4(H4A,H4B,H4C)
;
_atom_sites_solution_hydrogens    geom
_atom_sites_solution_primary      iterative
_atom_sites_solution_secondary    ?
loop_
  _atom_site_label
  _atom_site_type_symbol
  _atom_site_fract_x
  _atom_site_fract_y
  _atom_site_fract_z
  _atom_site_U_iso_or_equiv
  _atom_site_adp_type
  _atom_site_occupancy
  _atom_site_site_symmetry_order
  _atom_site_calc_flag
  _atom_site_refinement_flags_posn
  _atom_site_refinement_flags_adp
  _atom_site_refinement_flags_occupancy
  _atom_site_disorder_assembly
  _atom_site_disorder_group
 Pd1 Pd 0.13152(2) 0.34590(2) 0.45768(2) 0.01305(6) Uani 1 1 d . . . . .
 Cl1 Cl 0.18083(5) 0.40115(3) 0.30113(5) 0.01992(12) Uani 1 1 d . . . . .
 Cl1S Cl 0.84478(6) 0.33979(4) 1.00187(6) 0.03227(15) Uani 1 1 d . . . . .
 Cl2 Cl -0.04933(5) 0.29047(3) 0.33097(4) 0.01798(12) Uani 1 1 d . . . . .
 Cl2S Cl 0.79817(12) 0.49205(5) 1.02611(8) 0.0735(4) Uani 1 1 d . . . . .
 C11 C 0.2087(2) 0.18983(13) 0.5525(2) 0.0200(5) Uani 1 1 d . . . . .
 H11A H 0.1671 0.1987 0.4700 0.024 Uiso 1 1 calc R . . . .
 H11B H 0.1987 0.1392 0.5664 0.024 Uiso 1 1 calc R . . . .
 N5 N 0.03150(17) 0.32504(11) 0.65452(16) 0.0160(4) Uani 1 1 d . . . . .
 H5 H 0.0258 0.2976 0.7096 0.019 Uiso 1 1 calc R . . . .
 N2 N 0.14333(17) 0.23200(11) 0.61818(16) 0.0167(4) Uani 1 1 d . . . . .
 H2 H 0.1343 0.2126 0.6793 0.020 Uiso 1 1 calc R . . . .
 N1 N 0.36789(18) 0.41629(12) 0.63368(17) 0.0214(4) Uani 1 1 d . . . . .
 C10 C -0.0729(2) 0.40007(13) 0.7561(2) 0.0216(5) Uani 1 1 d . . . . .
 H10A H -0.1301 0.3612 0.7561 0.032 Uiso 1 1 calc GR . . . .
 H10B H -0.1152 0.4451 0.7570 0.032 Uiso 1 1 calc GR . . . .
 H10C H 0.0020 0.3967 0.8239 0.032 Uiso 1 1 calc GR . . . .
 C13 C 0.4325(2) 0.19963(16) 0.6963(2) 0.0272(6) Uani 1 1 d . . . . .
 H13 H 0.4002 0.1866 0.7552 0.033 Uiso 1 1 calc R . . . .
 C1 C 0.2818(2) 0.38882(13) 0.56789(19) 0.0178(5) Uani 1 1 d . . . . .
 C7 C -0.0338(2) 0.39571(12) 0.64636(19) 0.0156(4) Uani 1 1 d . . . . .
 C14 C 0.5632(3) 0.21221(17) 0.7231(2) 0.0341(6) Uani 1 1 d . . . . .
 H14 H 0.6176 0.2074 0.7995 0.041 Uiso 1 1 calc R . . . .
 C1S C 0.8418(3) 0.40991(16) 1.0982(2) 0.0366(7) Uani 1 1 d . . . . .
 H1SA H 0.7814 0.3980 1.1381 0.044 Uiso 1 1 calc R . . . .
 H1SB H 0.9259 0.4145 1.1565 0.044 Uiso 1 1 calc R . . . .
 C15 C 0.6118(3) 0.23157(18) 0.6374(3) 0.0370(7) Uani 1 1 d . . . . .
 H15 H 0.6995 0.2386 0.6549 0.044 Uiso 1 1 calc R . . . .
 C12 C 0.3499(2) 0.20626(13) 0.5830(2) 0.0203(5) Uani 1 1 d . . . . .
 C17 C 0.4005(3) 0.2277(2) 0.4986(2) 0.0419(8) Uani 1 1 d . . . . .
 H17 H 0.3465 0.2336 0.4223 0.050 Uiso 1 1 calc R . . . .
 C3 C 0.4740(2) 0.45210(18) 0.7216(3) 0.0395(8) Uani 1 1 d . . . . .
 C2 C 0.0974(2) 0.29737(12) 0.59045(18) 0.0143(4) Uani 1 1 d . . . . .
 C16 C 0.5310(3) 0.2405(2) 0.5254(3) 0.0538(10) Uani 1 1 d . . . . .
 H16 H 0.5635 0.2552 0.4674 0.065 Uiso 1 1 calc R . . . .
 C8 C 0.0562(2) 0.45800(13) 0.6477(2) 0.0212(5) Uani 1 1 d . . . . .
 H8A H 0.1342 0.4522 0.7118 0.032 Uiso 1 1 calc GR . . . .
 H8B H 0.0160 0.5025 0.6561 0.032 Uiso 1 1 calc GR . . . .
 H8C H 0.0750 0.4585 0.5760 0.032 Uiso 1 1 calc GR . . . .
 C9 C -0.1528(2) 0.39832(14) 0.5375(2) 0.0219(5) Uani 1 1 d . . . . .
 H9A H -0.1276 0.3936 0.4693 0.033 Uiso 1 1 calc GR . . . .
 H9B H -0.1960 0.4434 0.5350 0.033 Uiso 1 1 calc GR . . . .
 H9C H -0.2093 0.3596 0.5399 0.033 Uiso 1 1 calc GR . . . .
 C4A C 0.5967(4) 0.4374(4) 0.7035(5) 0.0501(15) Uani 0.690(6) 1 d . . P A 1
 H4AA H 0.6105 0.3864 0.7042 0.075 Uiso 0.690(6) 1 calc GR . P A 1
 H4AB H 0.6649 0.4595 0.7646 0.075 Uiso 0.690(6) 1 calc GR . P A 1
 H4AC H 0.5950 0.4567 0.6297 0.075 Uiso 0.690(6) 1 calc GR . P A 1
 C6A C 0.4398(5) 0.5259(3) 0.7336(5) 0.0489(15) Uani 0.690(6) 1 d . . P A 1
 H6AA H 0.4342 0.5520 0.6639 0.073 Uiso 0.690(6) 1 calc GR . P A 1
 H6AB H 0.5039 0.5475 0.7988 0.073 Uiso 0.690(6) 1 calc GR . P A 1
 H6AC H 0.3584 0.5274 0.7462 0.073 Uiso 0.690(6) 1 calc GR . P A 1
 C5A C 0.4767(5) 0.4085(3) 0.8407(4) 0.0515(15) Uani 0.690(6) 1 d . . P A 1
 H5AA H 0.3972 0.4159 0.8550 0.077 Uiso 0.690(6) 1 calc GR . P A 1
 H5AB H 0.5460 0.4262 0.9057 0.077 Uiso 0.690(6) 1 calc GR . P A 1
 H5AC H 0.4886 0.3581 0.8308 0.077 Uiso 0.690(6) 1 calc GR . P A 1
 C6 C 0.5102(10) 0.5144(7) 0.6246(10) 0.053(2) Uani 0.310(6) 1 d . . P A 2
 H6A H 0.5330 0.4884 0.5659 0.079 Uiso 0.310(6) 1 calc GR . P A 2
 H6B H 0.5805 0.5444 0.6676 0.079 Uiso 0.310(6) 1 calc GR . P A 2
 H6C H 0.4365 0.5438 0.5882 0.079 Uiso 0.310(6) 1 calc GR . P A 2
 C5 C 0.4371(11) 0.4969(8) 0.7997(11) 0.053(2) Uani 0.310(6) 1 d . . P A 2
 H5A H 0.3765 0.5321 0.7563 0.079 Uiso 0.310(6) 1 calc GR . P A 2
 H5B H 0.5112 0.5209 0.8508 0.079 Uiso 0.310(6) 1 calc GR . P A 2
 H5C H 0.3985 0.4682 0.8449 0.079 Uiso 0.310(6) 1 calc GR . P A 2
 C4 C 0.5807(12) 0.4092(8) 0.7514(11) 0.053(2) Uani 0.310(6) 1 d . . P A 2
 H4A H 0.5684 0.3691 0.7962 0.079 Uiso 0.310(6) 1 calc GR . P A 2
 H4B H 0.6538 0.4365 0.7968 0.079 Uiso 0.310(6) 1 calc GR . P A 2
 H4C H 0.5947 0.3921 0.6820 0.079 Uiso 0.310(6) 1 calc GR . P A 2

loop_
  _atom_site_aniso_label
  _atom_site_aniso_U_11
  _atom_site_aniso_U_22
  _atom_site_aniso_U_33
  _atom_site_aniso_U_23
  _atom_site_aniso_U_13
  _atom_site_aniso_U_12
 Pd1 0.01364(8) 0.01313(9) 0.01293(8) -0.00048(7) 0.00510(6) -0.00061(7)
 Cl1 0.0275(3) 0.0163(3) 0.0201(3) 0.0003(2) 0.0134(2) -0.0017(2)
 Cl1S 0.0350(3) 0.0403(4) 0.0245(3) 0.0054(3) 0.0138(3) 0.0105(3)
 Cl2 0.0180(2) 0.0192(3) 0.0152(2) -0.0029(2) 0.00329(19) -0.0022(2)
 Cl2S 0.1086(8) 0.0259(4) 0.0442(5) 0.0050(4) -0.0321(5) -0.0085(5)
 C11 0.0224(11) 0.0176(12) 0.0204(11) -0.0031(10) 0.0077(9) 0.0044(10)
 N5 0.0193(9) 0.0137(9) 0.0158(9) 0.0031(8) 0.0071(7) 0.0017(8)
 N2 0.0180(9) 0.0167(10) 0.0169(9) 0.0021(8) 0.0078(7) 0.0025(8)
 N1 0.0165(9) 0.0238(11) 0.0237(10) -0.0013(9) 0.0063(8) -0.0004(9)
 C10 0.0284(12) 0.0193(12) 0.0218(11) 0.0011(10) 0.0147(10) 0.0030(11)
 C13 0.0258(12) 0.0325(15) 0.0241(12) -0.0001(12) 0.0094(10) 0.0046(12)
 C1 0.0171(11) 0.0187(12) 0.0188(10) 0.0021(10) 0.0076(9) 0.0010(10)
 C7 0.0184(10) 0.0125(10) 0.0174(10) 0.0014(9) 0.0078(8) 0.0028(9)
 C14 0.0238(13) 0.0436(17) 0.0303(13) -0.0049(14) 0.0028(11) 0.0056(13)
 C1S 0.0467(17) 0.0321(16) 0.0301(14) 0.0060(13) 0.0113(13) 0.0132(14)
 C15 0.0195(12) 0.0456(18) 0.0459(16) 0.0014(15) 0.0106(12) 0.0051(13)
 C12 0.0222(11) 0.0164(11) 0.0240(11) 0.0031(10) 0.0098(9) 0.0070(10)
 C17 0.0255(14) 0.072(2) 0.0281(13) 0.0150(16) 0.0091(11) 0.0067(15)
 C3 0.0164(12) 0.0426(18) 0.0487(17) -0.0238(16) -0.0040(12) 0.0001(13)
 C2 0.0120(9) 0.0159(11) 0.0130(9) -0.0003(9) 0.0014(8) -0.0017(9)
 C16 0.0282(15) 0.096(3) 0.0434(17) 0.020(2) 0.0197(14) 0.0055(18)
 C8 0.0229(11) 0.0154(11) 0.0280(12) 0.0004(10) 0.0120(10) 0.0007(10)
 C9 0.0182(11) 0.0236(13) 0.0218(11) -0.0001(11) 0.0035(9) 0.0028(10)
 C4A 0.018(2) 0.064(4) 0.071(4) -0.027(3) 0.019(2) -0.016(2)
 C6A 0.034(2) 0.032(3) 0.064(3) -0.015(3) -0.006(2) 0.000(2)
 C5A 0.052(3) 0.061(4) 0.028(2) 0.006(2) -0.006(2) -0.004(3)
 C6 0.038(4) 0.063(5) 0.050(4) -0.015(4) 0.004(3) -0.019(4)
 C5 0.038(4) 0.063(5) 0.050(4) -0.015(4) 0.004(3) -0.019(4)
 C4 0.038(4) 0.063(5) 0.050(4) -0.015(4) 0.004(3) -0.019(4)

_geom_special_details
;
 All esds (except the esd in the dihedral angle between two l.s. planes)
 are estimated using the full covariance matrix.  The cell esds are taken
 into account individually in the estimation of esds in distances, angles
 and torsion angles; correlations between esds in cell parameters are only
 used when they are defined by crystal symmetry.  An approximate (isotropic)
 treatment of cell esds is used for estimating esds involving l.s. planes.
;
loop_
  _geom_bond_atom_site_label_1
  _geom_bond_atom_site_label_2
  _geom_bond_distance
  _geom_bond_site_symmetry_2
  _geom_bond_publ_flag
 Pd1 Cl1 2.3764(5) . ?
 Pd1 Cl2 2.3256(6) . ?
 Pd1 C1 1.932(2) . ?
 Pd1 C2 1.989(2) . ?
 Cl1S C1S 1.760(3) . ?
 Cl2S C1S 1.748(3) . ?
 C11 N2 1.466(3) . ?
 C11 C12 1.512(3) . ?
 N5 C7 1.487(3) . ?
 N5 C2 1.331(3) . ?
 N2 C2 1.318(3) . ?
 N1 C1 1.143(3) . ?
 N1 C3 1.462(3) . ?
 C10 C7 1.532(3) . ?
 C13 C14 1.393(4) . ?
 C13 C12 1.386(3) . ?
 C7 C8 1.523(3) . ?
 C7 C9 1.529(3) . ?
 C14 C15 1.367(4) . ?
 C15 C16 1.370(4) . ?
 C12 C17 1.378(3) . ?
 C17 C16 1.391(4) . ?
 C3 C4A 1.469(5) . ?
 C3 C6A 1.444(6) . ?
 C3 C5A 1.650(6) . ?
 C3 C6 1.788(12) . ?
 C3 C5 1.420(12) . ?
 C3 C4 1.370(14) . ?

loop_
  _geom_angle_atom_site_label_1
  _geom_angle_atom_site_label_2
  _geom_angle_atom_site_label_3
  _geom_angle
  _geom_angle_site_symmetry_1
  _geom_angle_site_symmetry_3
  _geom_angle_publ_flag
 Cl2 Pd1 Cl1 91.97(2) . . ?
 C1 Pd1 Cl1 90.32(7) . . ?
 C1 Pd1 Cl2 177.53(7) . . ?
 C1 Pd1 C2 88.49(9) . . ?
 C2 Pd1 Cl1 177.52(6) . . ?
 C2 Pd1 Cl2 89.18(6) . . ?
 N2 C11 C12 114.27(19) . . ?
 C2 N5 C7 130.48(19) . . ?
 C2 N2 C11 124.82(19) . . ?
 C1 N1 C3 177.1(2) . . ?
 C12 C13 C14 120.8(2) . . ?
 N1 C1 Pd1 177.4(2) . . ?
 N5 C7 C10 104.94(17) . . ?
 N5 C7 C8 111.76(18) . . ?
 N5 C7 C9 110.27(19) . . ?
 C8 C7 C10 108.64(19) . . ?
 C8 C7 C9 110.97(19) . . ?
 C9 C7 C10 110.07(18) . . ?
 C15 C14 C13 120.1(3) . . ?
 Cl2S C1S Cl1S 112.11(16) . . ?
 C14 C15 C16 119.8(3) . . ?
 C13 C12 C11 121.1(2) . . ?
 C17 C12 C11 120.9(2) . . ?
 C17 C12 C13 118.0(2) . . ?
 C12 C17 C16 121.2(3) . . ?
 N1 C3 C4A 111.4(3) . . ?
 N1 C3 C5A 101.4(3) . . ?
 N1 C3 C6 96.5(4) . . ?
 C4A C3 C5A 106.7(4) . . ?
 C6A C3 N1 109.5(3) . . ?
 C6A C3 C4A 118.5(4) . . ?
 C6A C3 C5A 108.0(4) . . ?
 C5 C3 N1 114.7(5) . . ?
 C5 C3 C6 103.6(8) . . ?
 C4 C3 N1 110.0(6) . . ?
 C4 C3 C6 101.1(8) . . ?
 C4 C3 C5 125.2(8) . . ?
 N5 C2 Pd1 125.73(17) . . ?
 N2 C2 Pd1 117.80(15) . . ?
 N2 C2 N5 116.47(19) . . ?
 C15 C16 C17 120.0(3) . . ?

_shelx_SHELXL_version_number      '2014/7'
_olex2_submission_special_instructions 'No special instructions were received'
